# Supplementary material for: Dependent or not? From a daily practice of Earth observation research in the Global South to promoting adequate developmental spaces in science and technology studies
Source: Copernicus journal article supplement (doi:10.5194/gh-78-105-2023), 2023-02-28
Supplement: Supplementary file 1 [file gh-78-105-2023-supplement.zip]

Archive with 3 entries (3 files):
- Copernicus_gh-2021-39_Figure S1.pptx
- Copernicus_gh-2021-39_Table S1.docx
- gh-78-105-2023-supplement-title-page.pdf
