# Supplementary material for: Dependent or not? From a daily practice of Earth observation research in the Global South to promoting adequate developmental spaces in science and technology studies
Source: Copernicus journal article supplement (doi:10.5194/gh-78-105-2023), 2023-02-28
Supplement: Supplementary file 1 [file gh-78-105-2023-supplement.zip › Copernicus_gh-2021-39_Table S1.docx]

Table S1. Overview Interviews

| Interview | Institute/ Organisation | Position | Location | IV Type | Date | Duration hh:mm |
| --- | --- | --- | --- | --- | --- | --- |
| 1 | Department of Geography I | Senior lecturer | office | semi- structured | 13.10.15 | 01:14 |
| 2 | Research Institute[[1]](#footnote-1) II | Lecturer | office | semi- structured | 15.10.15 | 01:03 |
| 3 | Department of Geography I | Lecturer | GIS lab | semi- structured | 15.10.15 | 00:26 |
| 4 | Research Institute II | Senior scientific officer | office | semi- structured | 16.10.15 | 00:50 |
| 5 | Department of Geography I | senior | office | semi-stuctured | 18.03.16 | 00:30 |
| 6 | Department of Geography I | Technical officer | GIS lab | semi- structured | 19.10.15 | 00:57 |
| 7 (FG 1) | Space Club I | Board members | office | mini focus group | 19.10.15 | 00:45 |
| 8 | Research Institute II | Staff | office | semi- structured | 21.10.15 | 00:41 |
| 9 | Research Institute II | Staff | office | semi- structured | 22.10.15 | 00:52 |
| 10 | Department of Geography I | PG student | outside | semi- structured | 22.10.15 | 00:52 |
| 11 | Department of Geography I | PG student | outside | semi- structured | 23.10.15 | 01:17 |
| 12 | Department of Geography I | Lecturer | office | semi- structured | 27.10.15 | 00:34 |
| 13 | Department of Geography I & Research Institute II | Lecturer | office | semi- structured | 29.10.15 | 01:36 |
| 14 | Department of Geography I | Lecturer | office | semi- structured | 04.11.15 | 01:24 |
| 15 | Research Institute II | Lecturer | office | semi- structured | 05.11.15 | 01:00 |
| 16 (FG 2) | Department of Geography I | PG students | PG Room | focus group | 09.11.15 | 02:16 |
| 17 | Geoinformatics | Professor | office | semi- structured | 10.11.15 | 01:11 |
| 18 | Research Institute III | Staff | corridor | semi- structured | 11.11.15 | 01:12 |
| 19 | Research Institute I | Dean of academics | office | semi- structured | 13.11.15 | 00:27 |
| 20 | Research Institute I | Head of GIS | office | semi- structured | 25.11.15 | 00:56 |
| 21 | Department of Geography I | PhD student and lecturer | office | semi- structured | 13.11.15 | 01:03 |
| 22 | Institute of Ecology and Environmental Studies | Lecturer | office | semi- structured | 27.11.15 | 02:21 |
| 23 | Research Institute I | Lecturer | office | semi- structured | 03.12.15 | 01:48 |
| 24 | Research Institute I | Lecturer | office | semi- structured | 07.12.15 | 02:48 |
| 25 | Institute of Ecology and Environmental Studies | PhD student | seminar room | semi- structured | 15.12.15 | 00:49 |
| 26 | Research Institute III | Scientific officer | GIS lab | semi- structured | 16.12.15 | 02:04 |
| 27 | Research Institute I | Deputy Director | office | semi- structured | 02.01.16 | 01:56 |
| 28 | Research Institute I | Lecturer | office | semi- structured | 06.01.16 | 01:21 |
| 29 | Department of Geography I | Professor Emeritus | office | semi- structured | 07.01.16 | Not rec. |
| 30 | Dept. of Remote Sensing & GIS | Senior lecturer | office | semi- structured | 13.01.16 | 00:43 |
| 31 | Dept. of Remote Sensing & GIS | Lecturer | office | semi- structured | 13.01.16 | 01:18 |
| 32 | Dept. of Remote Sensing & GIS | Technical officer | GIS Lab | semi- structured | 18.01.16 | 00:59 |
| 33 | Dept. of Remote Sensing & GIS | Lecturer | office | semi- structured | 18.01.16 | 01:21 |
| 34 | Dept. of Remote Sensing & GIS | Student | office | semi- structured | 18.01.16 | 00:33 |
| 35 | Research Institute II | Student | office | semi- structured | 19.01.16 | 00:45 |
| 36 (FG3) | Dept. of Remote Sensing & GIS | Students | outside | focus group | 20.01.16 | 01:42 |
| 37 (FG4) | Space Club II | Students | lecture room | focus group | 23.01.16 | 00:49 |
| 38 | Dep. of Remote Sensing & GIS | Lecturer | office | semi- structured | 25.01.16 | 01:13 |
| 39 | Dept. of Remote Sensing & GIS | Lecturer | office | semi- structured | 25.01.16 | 00:38 |
| 40 | Meteorology | Professor | office | semi- structured | 25.01.16 | 00:49 |
| 41 | Space Club II/ Meteorology | President/student | outside | semi- structured | 27.01.16 | 00:28 |
| 42 | Research Institute IV | Deputy Director Space Applications/ Lecturer | scholars lodge | semi- structured | 27.01.16 | 00:44 |
| 43 | Research Institute IV | Director | office | semi- structured | 27.01.16 | 01:22 |
| 44 | Research Institute I | Students | lecture room | group interview | 28.01.16 | 01.04 |
| 45 | Research Institute I | Student | GIS lab | semi- structured | 29.01.16 | 00:48 |
| 46 (FG5) | Research Institute I | Students | lecture room | focus group | 29.01.16 | 01:37 |
| 47 | Meteorology | Lecturer | office | semi- structured | 29.01.16 | 00:47 |
| 48 | Research Institute I | Lecturer | Hostel restaurant | semi- structured | 26.01.16 | 01:22 |
| 49 | Former student DoG I and GIS Consultant | GIS consultant | office | semi- structured | 08.02.16 | 01:35 |
| 50 (FG6) | Research Institute III | Staff | Lecture room | focus group | 08.02.16 | 01:06 |
| 51 | Research Institute III | Staff | GIS Lab | semi- structured | 08.02.16 | 00:30 |
| 52 | Department of Geography I | Professor | office | semi- structured | 11.02.16 | 00:21 |
| 53 | Research Institute V | Professor | office | semi- structured | 17.02.16 | 00:25 |
| 54 | Research Institute II | Staff | office | semi- structured | 20.02.16 | 01:26 |
| 55 | Research Institute VI | Analyst | library | semi- structured | 23.02.16 | 00:49 |
| 56 | Department of Geography II | Lecturer | office | semi- structured | 23.02.16 | 00:26 |
| 57 | Department of Geography II | Student | office | semi- structured | 23.02.16 | 00:18 |
| 58 | Department of Geography II | Lecturer | office | semi- structured | 24.02.16 | 01:10 |
| 59 (FG7) | Department of Geography II | Students | GIS lab | focus group | 24.02.16 | 01:01 |
| 60 | Department of Geography II | Lecturer | office | semi- structured | 24.02.16 | 01:01 |
| 61 | Department of Geography II | Staff | office | semi- structured | 25.02.16 | 00:57 |
| 62 | Department of Geography II | Lecturer | office | semi- structured | 26.02.16 | 00:39 |
| 63 (FG8) | Research Institute VII | Staff | GIS lab | focus group | 25.02.16 | 01:00 |
| 64 | Vetenary Medicine | Senior lecturer | office | semi- structured | 29.02.16 | 01:11 |
| 65 | Department of Geography II | Emeritus professor | office | semi- structured | 29.02.16 | 01:14 |
| 66 | Department of Geography II | Student | office | semi- structured | 01:03.16 | 00:30 |
| 67 | Research Institute VII | Staff | GIS lab | semi- structured | 01.03.16 | 01:11 |
| 68 | Department of Forestry | Lecturer | GIS lab | semi- structured | 02.03.16 | 00:59 |
| 69 | Department of Geology | Lecturer | office | semi- structured | 02.03.16 | 00:44 |
| 70 | Department of Geography II | Lecturer | office | semi- structured | 03.03.16 | 00:59 |
| 71 (FG9) | Research Institute IX (Surveying) | Staff | office | focus group | 07.03.16 | 00:49 |
| 72 | Department of Geography II | Lecturer | GIS lab | semi- structured | 07.03.16 | 00:30 |
| 73 | Research Institute I | Staff | office | semi- structured | 15.03.16 | 00:57 |
| 74 | Research Institute I | Staff | office | semi- structured | 17.03.16 | 00:47 |
| 75 | Department of Geography I | Staff | office | semi- structured | 21.03.16 | 01:13 |
| 76 | National Institution I | Staff | hostel room | semi- structured | 21.03.16 | 01:03 |
| 77 | Department of Geography III | Lecturer | office | semi- structured | 24.03.16 | 01:28 |
| 78 | Department of Geography III | Lecturer | lab | semi- structured | 25.03.16 | 00:36 |
| 79 | Department of Geography III | Lecturer | office | semi- structured | 25.02.16 | 00:39 |
| 80 | GIS Consulting | CEO | guest house | semi- structured | 28.03.16 | 01:22 |
| 81 | Department of Surveying and Geoinformatics | Lecturer | office | semi- structured | 29.03.16 | 01:34 |
| 82 (FG10) | Department of Surveying and Geoinformatics | Staff | office | focus group | 30.03.16/ 02:09  04.04.16 | |
| 83 | Department of Geography III | Lecturer | office | semi- structured | 30.03.16 | 00:54 |
| 84 | Department of Surveying and Geoinformatics | Professor | office | semi- structured | 31.03.16 | 00:35 |
| 85 | Department of Geography III | Lecturer | office | semi- structured | 31.03.16 | 00:28 |
| 86 (FG11) | Department of Geography III | Students | class room | focus group | 02.04.16 | 00:50 |
| 87 | Department of Surveying and Geoinformatics | Lecturer | HoD office | semi- structured | 05.04.16 | 00:36 |
| 88 (FG12) | Department of Geography III | Students | GIS lab | focus group | 06.04.16 | 01:20 |
| 89 | Department of Surveying and Geoinformatics | Lecturer and Sub-Dean | office | semi- structured | 07.04.16 | 01:10 |
| 90 | Department of Geography III | Professor | HoD office | semi- structured | 05.04.16 | 01:05 |
| 91 | Department of Geography III | Lecturer | office | semi- structured | 08.04.16 | 00:56 |
| 92 | Software company | Staff | outside | semi- structured | 15.04.16 | 00:52 |
| 93 | Department of Geography III | Lecturer | office | semi- structured | 20.04.16 | 01:57 |
| 94 | Department of Geography III | Emeritus professor | office | semi- structured | 20.04.16 | 01:42 |
| 95 | Department of Geography III | Professor | office | semi- structured | 21.04.16 | 00:48 |
| 96 | EO Faculty, NL | Academic staff | office | semi- structured | 07.09.16 | Not rec. |
| 97 | EO Faculty, NL | Academic staff & coordinator | office | semi- structured | 08.09.16 | 00:37 |
| 98 | EO Faculty, NL | Academic staff | Cafeteria | semi- structured | 09.09.16 | Not rec. |
| 99 | EO Faculty, NL | Academic staff | office | semi- structured | 09.09.16 | Not rec. |
| 100 | EO Faculty, NL | Academic staff | office | semi- structured | 12.09.16 | Not rec. |
| 101 | EO Faculty, NL | Academic staff | office | semi- structured | 13.09.16 | Not rec. |
| 102 | EO Faculty, NL | Academic staff | office | semi- structured | 15.09.16 | Not rec. |
| 103 | EO Faculty, NL | Academic staff | office | semi- structured | 16.09.16 | Not rec. |

1. All those institutions that are listed as “research institute” also teach (some with official degree programmes). [↑](#footnote-ref-1)
