# Supplementary material for: Dependent or not? From a daily practice of Earth observation research in the Global South to promoting adequate developmental spaces in science and technology studies
Source: Copernicus journal article supplement (doi:10.5194/gh-78-105-2023), 2023-02-28
Supplement: Supplementary file 1 [file gh-78-105-2023-supplement.zip › gh-78-105-2023-supplement-title-page.pdf]

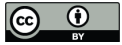

*Supplement of*

**Dependent or not? From a daily practice of Earth observation research in the Global South to promoting adequate developmental spaces in science and technology studies**

**Daniel Thorpe**

*Correspondence to:* Daniel Thorpe (d.thorpe@ed-alumni.net)

- gh-78-105-2023-supplement-title-page.pdf
- Copernicus\_gh-2021-39\_Figure S1.pptx
- Copernicus\_gh-2021-39\_Table S1.docx

The copyright of individual parts of the supplement might differ from the article licence.
